# Supplementary material
Source: Research Square preprint supplement (doi:10.21203/rs.3.rs-9619554/v1)
Supplement: Supplementary file 1 [file 32860041d0d8acf9a1fc01db.docx]

**Supplemental Information**

**SREBP2 coordinates cholesterol biosynthesis, *Hsd3b1* transcription, and SF-1 chromatin accessibility to drive steroidogenesis in Leydig cells**

Atrayee Chattopadhyay1, Tirumalasetty Munichandra1, Chandana Prakashmurthy1, Qing Miao1, M. Mahmood Hussain1#

1Department of Foundations of Medicine, NYU Grossman Long Island School of Medicine, Mineola, NY, USA

**#Correspondence**: [Mahmood.hussain@nyulangone.org](mailto:Mahmood.hussain@nyulangone.org)

- Supplementary Figures 2 with legends
- Supplementary Tables 2
- Full Western blots 2

**Supplementary Figures**

**Fig. S1**

**Fig. S1 Downregulation of steroidogenic pathways in SREBP2 deficient MA-10 cells.**

**A**. Dot plot showing downregulation of GO processes in KO clones.

**B.** Table showing the top 5 most downregulated pathways based on the gene enrichment analysis of the transcriptomics data.

**C-D**. Primary Leydig cells were isolated from 4-month-old C57BL/6J mice and cultured for 48 h. Cells were then electroporated with *Srebf2* sgRNA and cultured for an additional 48 h before 8-BrcAMP stimulation for mRNA (**C**) and testosterone (**D**) measurement. Each value is represented as mean ± SD (*n* = 3). Data represents one set of two independent experiments. Statistical analyses are performed by unpaired t-tests, * p <0.05.

**Fig. S2**

**Fig. S2 ATAC-Seq analysis showing changes in the genomic landscape due to *Srebf2* deletion.**

**A**. Chromatin accessibility changes in the total number of genes in the *Srebf2* KO cells.

**B**. Aggregate accessibility profiles (top) and heatmaps (bottom) for the top 1,000 peaks with greater accessibility (gain, KO↑; blue) and the top 1,000 peaks with less accessibility (loss, KO↓; green) in WT and KO cells. Signal intensities are normalized read counts ± 3 kb around the peak center.

**C**. Genomic locations of changes among the top 1000 gain (top) and loss of accessibility (bottom) peaks in *Srebf2* KO cells.

**D**. Genomic distribution of differential peaks relative to TSS. Bar plots indicate the percentage of gained (top) or lost (bottom) peaks distributed across genomic distances from the nearest TSS.

**Supplementary Tables**

**Table S1. Sources of antibodies and chemicals used in the study**

| **Antibodies** | | | | |
| --- | --- | --- | --- | --- |
| **Name** | **Company** | **Catalog** | | **Purpose** |
| anti-Cyp11a1 | CST | 14217S | | WB |
| anti-Hsd3B1 | Santa Cruz | sc-515120 | | WB |
| anti-Srebp2 | Abcam | ab30682 | | WB, ChIP |
| anti-LDLR | Abcam | ab52818 | | WB |
| anti-SCAP | Abcam | ab308060 | | WB |
| anti-B-actin | CST | 4967S | | WB |
| anti-rabbit IgG | CST | 7074S | | WB |
| anti-mouse IgG | Invitrogen | 62-6520 | | WB |
| SF-1 | Santa Cruz | sc-393592 X | | ChIP |
| Mouse IgG | Abcam | ab18413 | | ChIP |
| Rabbit IgG | Abcam | ab171870 | | ChIP |
| **Kits and Reagents** | | | | |
| **Name** | **Company** | | **Catalog** | |
| 8-BrcAMP | Fisher | | 1140/50 | |
| 22(R)-hydroxycholesterol | Sigma | | H9384 | |
| 4× Laemmli buffer | Bio-Rad | | 1610747 | |
| ALLN | Sigma | | 208719 | |
| BSA | Thermo Fisher Scientific | | 23209 | |
| CellTiter 96® Aqueous One Solution Cell Proliferation Assay kit | Promega | | G3582 | |
| ChIP Express kit | Active Motif | | 53008 | |
| Chromatin IP DNA purification kit | Active Motif | | 58002 | |
| Cholesterol reagent | Pointe Scientific | | C7510500 | |
| Collagenase IV | GIBCO | | 17104-019 | |
| Dual-Glo® Luciferase Assay System | Promega | | E2920 | |
| DMEM/F12 medium | Fisher | | 11-330-032 | |
| Endofectin Max transfection reagent | Genecopoeia | | EF013 | |
| Gelatin | Merck | | G1393 | |
| hcG | Fisher | | 23-073 | |
| High-Capacity cDNA Reverse Transcription Kit | Thermo Fisher Scientific | | 4374967 | |
| Horse serum | Thermo Fisher | | 16050122 | |
| MA10 cell line | ATCC | | CRL-3050 | |
| Neon transfection system 10 μL kit | Thermo Fisher Scientific | | MPK1096 | |
| Nitrocellulose membrane | Amersham | | 10600002 | |
| Opti-MEM medium | Gibco | | 31985070 | |
| Pefabloc SC | Sigma | | PEFBSC-RO | |
| Pierce™ BCA Protein Assay Kit | Thermo Fisher Scientific | | 23225 | |
| Phosphatase inhibitor cocktail | Sigma | | P0044 | |
| Pregnenolone | Sigma | | P9129-1G | |
| Progesterone ELISA kit | Cayman | | 582601 | |
| ProLong Gold antifade reagent with DAPI | Life Technologies | | 2841592 | |
| Protease inhibitor cocktail | Sigma | | P2714-1BTL | |
| Protein A/G PLUS Agarose beads | Santa Cruz | | sc-2003 | |
| qMax Green lowROX 2× qPCR mix | Accuris | | PR2000-L-100 | |
| RIPA buffer | Thermo Fisher Scientific | | J63306.AP | |
| SuperSignal™ West Pico PLUS Chemiluminescent Substrate | Thermo Fisher Scientific | | 34578 | |
| Testosterone ELISA kit | Cayman | | 582701 | |
| TRIzol reagent | Thermo Fisher Scientific | | 15596018 | |
| **Probes, sgRNAs, plasmids** | | | | |
| *Srebf2*sgRNA1 | Synthego | | 82169762 | |
| *Srebf2*sgRNA2 | Synthego | | 82169781 | |
| pSynSRE-T-Luc | Addgene | | 60444 | |
| pRL-TK | Promega | | E2241 | |
| pcDNA6-N-Flag-SREBP2 | Addgene | | 134284 | |

**Table S2. Primers used for mRNA quantifications**

| **Gene name** | **Forward sequence (5’-3’)** | **Reverse sequence (5’-3’)** |  |
| --- | --- | --- | --- |
| **qPCR** | | | |
| *Srebf2* | AGCAGGTGCAGACGGTACAG | CAGCGTGGTCAACACAAGGG | This study |
| *Srebf1a* | GATGTGCGAACTGGACACAGC | GAGAAGCTCTCAGGAGAGTTGG | [1] |
| *Srebf1c* | CGCGGACCACGGAGCCATG |
| *Hmgcr* | CTTGTGGAATGCCTTGTGATT | AGCCGAAGCAGCACATGAT | This study |
| *Stard4* | CCTGGCGCTTGGACTGGGAC | AGCTGCCCAGCAGTGGTGTAAC | This study |
| *Cyp51* | TGGAGCGAAAAGTCCACCAC | TGCATCACTCCCCAGAAGGTA | [2] |
| *Fdft1* | AACATGCCTGCCGTCAAAGCTATC | GAGATGACCTGCTTGGTTTTGCTT | [3] |
| *Abca1* | GCTTGTTGGCCTCAGTTAGG | GTAGCTCAGGCGTACAGAGAT | [2] |
| *Ldlr* | TGACTCAGACGAACAAGGCTG | CTAACTAAACACCAGACAGAGGC | This study |
| *Scarb1* | GCTGCGCTCGGCGTTGTCAT | GGGACGGGGATCTCCTTCCA | [2] |
| *Star* | AGTATTGACCTGAAGGGGTGGC | GGTGGTTGGCGAACTCTATCTG | This study |
| *Cyp11a1* | AAAGACCGAATCGTCCTAAACC | CTTGATGCGTCTGTGTAAGACT | This study |
| *Hsd3b1* | CCAGGGCATCTCTGTTGTCA | CCAATAGGTTCTGGGTACCTTTCA | This study |
| *Cyp17a1* | CCAGATGGTGACTCTAGGCCTCTTGTC | GGTCTGTATGGTAGTCAGTATCG | This study |
| *Hsd17b7* | TCCTCTGACCAAATACGCGAGC | TGGTCCTGACACGCTTTTCCAG | [2] |
| *Nr5a1* | AGCCAAAAGCCGCTCTGAC | CCACCTCCAGCTCCTTAAAGAC | This study |
| *18S* | AGTCCCTGCCCTTTGTACACA | GATCCGAGGTCACTAAAC | This study |
| **ChIP for Srebp2** | | | |
| *Hmgcr* | GCTCGGAGACCAATAGGA | CCGCCAATAAGGAAGGAT | [4] |
| *Ldlr* | GAACTTCCCACTGCTGC | CACGCCCAGAGTCATTC | [5] |
| *Hsd3b1* | CCTGTCTGCAACATGGGTCT | CAGCATACAGCAGGTACCAGAA | This study |
| **ChIP for SF-1** | | | |
| *Hmgcr* | GGCACCTGAATGGTCTAGAACTGA | TGGTAAAGAGATCTACTGCCCACA | [3] |
| *Hsd3b1* | CAACGTCATTCCCCTCTGACC | CTGCACAGTCATTCCAGAGC | This study |

**References**

1. Vergnes, L., et al., *SREBP-2-deficient and hypomorphic mice reveal roles for SREBP-2 in embryonic development and SREBP-1c expression.* J Lipid Res, 2016. **57**(3): p. 410-21.

2. Shen, W.J., et al., *Ablation of Steroidogenic Superoxide Dismutase 2 Increases Oxidative Stress and Diminishes Steroid Hormone Production.* Endocrinology, 2025. **166**(9).

3. Baba, T., et al., *Ad4BP/SF-1 regulates cholesterol synthesis to boost the production of steroids.* Commun Biol, 2018. **1**: p. 18.

4. Zhou, X., et al., *Qki regulates myelinogenesis through Srebp2-dependent cholesterol biosynthesis.* Elife, 2021. **10**.

5. Seo, Y.K., et al., *Genome-wide localization of SREBP-2 in hepatic chromatin predicts a role in autophagy.* Cell Metab, 2011. **13**(4): p. 367-375.

**Full Western blots**

**WB for Fig. 1C**

**WB for Fig. 3F**
